# Supplementary material for: A pillar[5]arene noncovalent assembly boosts a full-color lanthanide supramolecular light switch
Source: Royal Society of Chemistry journal article supplement (doi:10.1039/d3sc01425h), 2023-01-01
Supplement: d3sc01425h1.pdf [file d3sc01425h1.pdf]

## Electronic Supplementary Information

# Pillar[5]arene Noncovalent Assembly Boosting Full-color Lanthanide Luminescent Supramolecular Light Switch

Wei-Lei Zhou<sup>+a,b</sup>, Xian-Yin Dai<sup>+a,c</sup>, Wenjing Lin<sup>a</sup>, Yong Chen<sup>a</sup>, and Yu Liu<sup>\*a</sup>

<sup>a</sup> College of Chemistry, State Key Laboratory of Elemento-Organic Chemistry, Nankai University, Tianjin 300071, P. R. China, E-mail: yuliu@nankai.edu.cn

<sup>b</sup> College of Chemistry and Material Science, Innovation Team of Optical Functional Molecular Devices, Inner Mongolia Minzu University, Tongliao 028000, P. R. China.

<sup>c</sup> School of Chemistry and Pharmaceutical Engineering, Shandong First Medical University & Shandong Academy of Medical Sciences, Taian, Shandong 271016, P. R. China

<sup>+</sup> These authors contributed equally to this work.

### Table of Contents

|                                       |              |
|---------------------------------------|--------------|
| <b>1. Synthetic Protocols</b> .....   | <b>2-11</b>  |
| <b>2. Characterization Data</b> ..... | <b>12-20</b> |

## 1. Synthetic Protocols

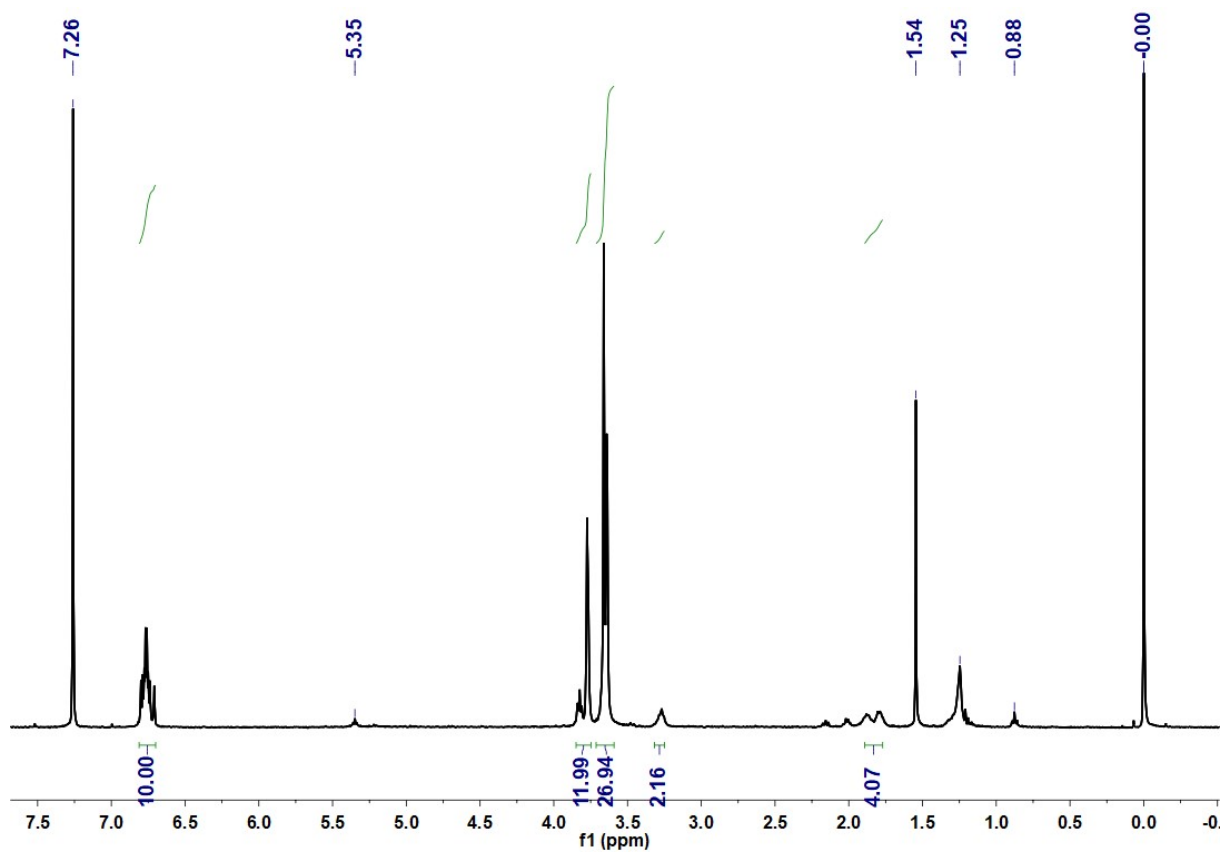

Fig. S1  $^1\text{H}$  NMR (400 MHz) spectrum of **1** in  $\text{CDCl}_3$  at 25  $^\circ\text{C}$ .

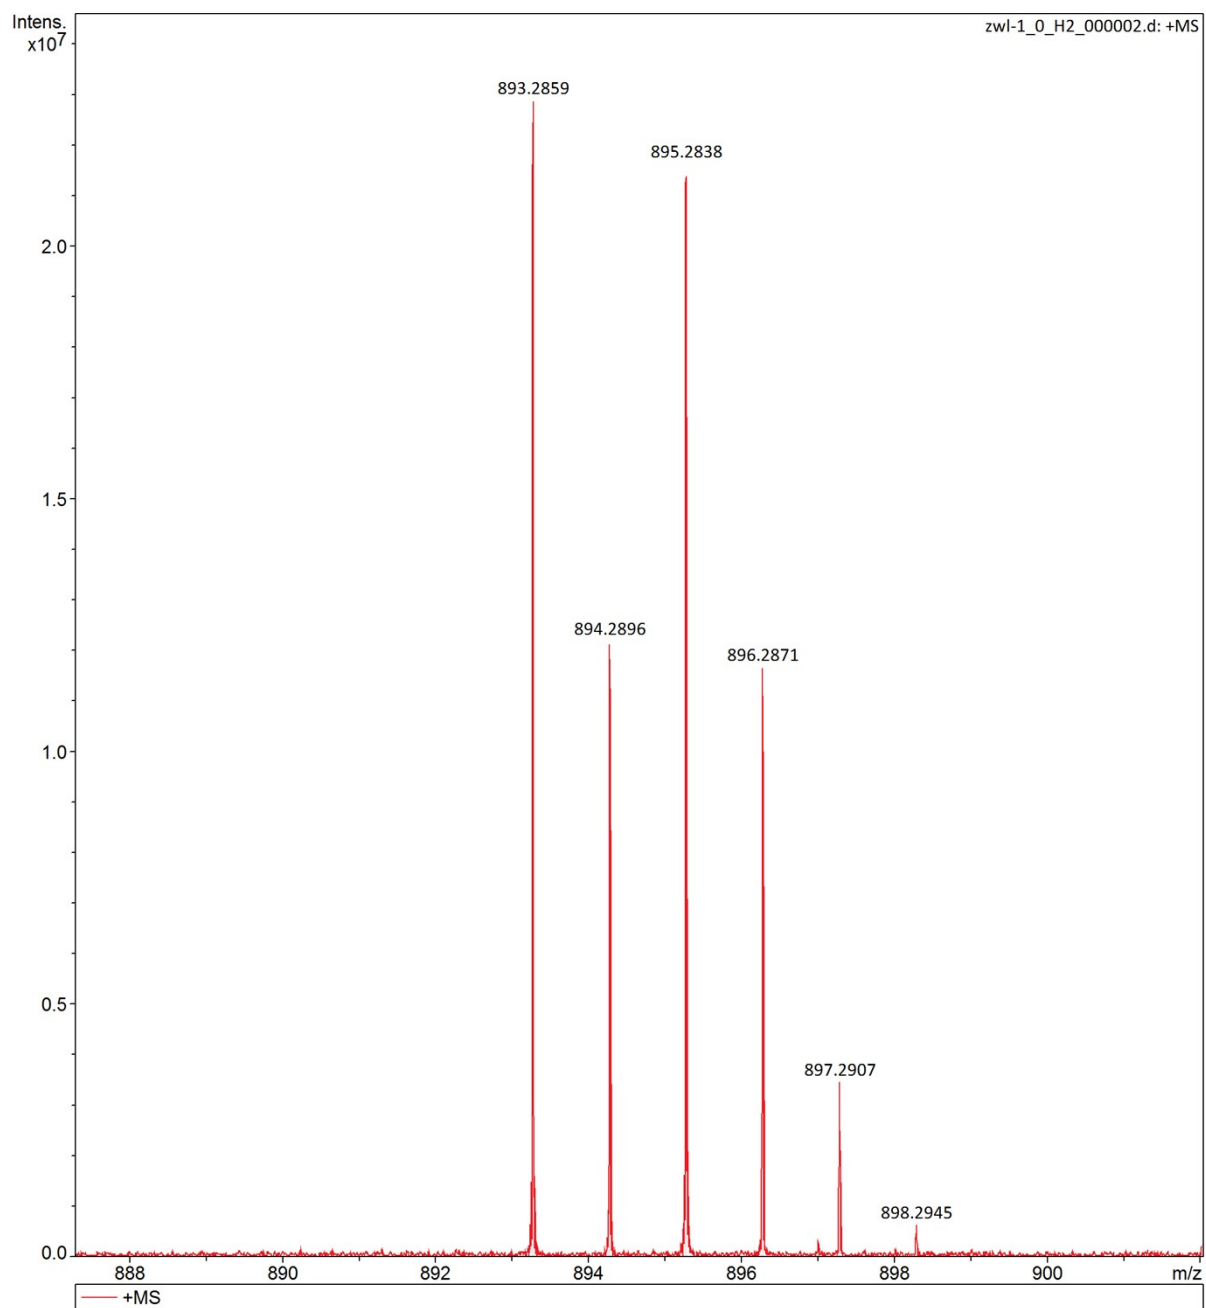

**Fig. S2** HR-MS (ESI) spectrum of **1**.

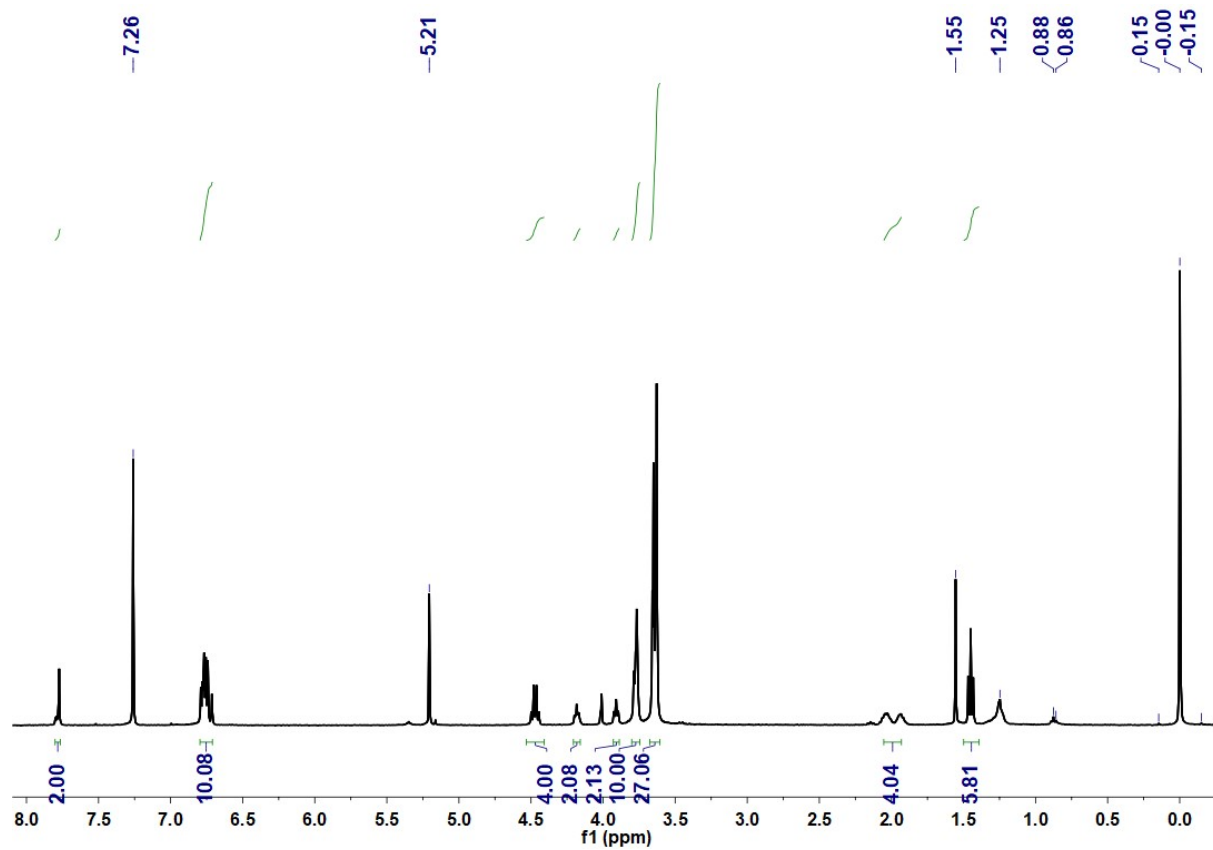

Fig. S3  $^1\text{H}$  NMR (400 MHz) spectrum of **2** in  $\text{CDCl}_3$  at 25  $^\circ\text{C}$ .

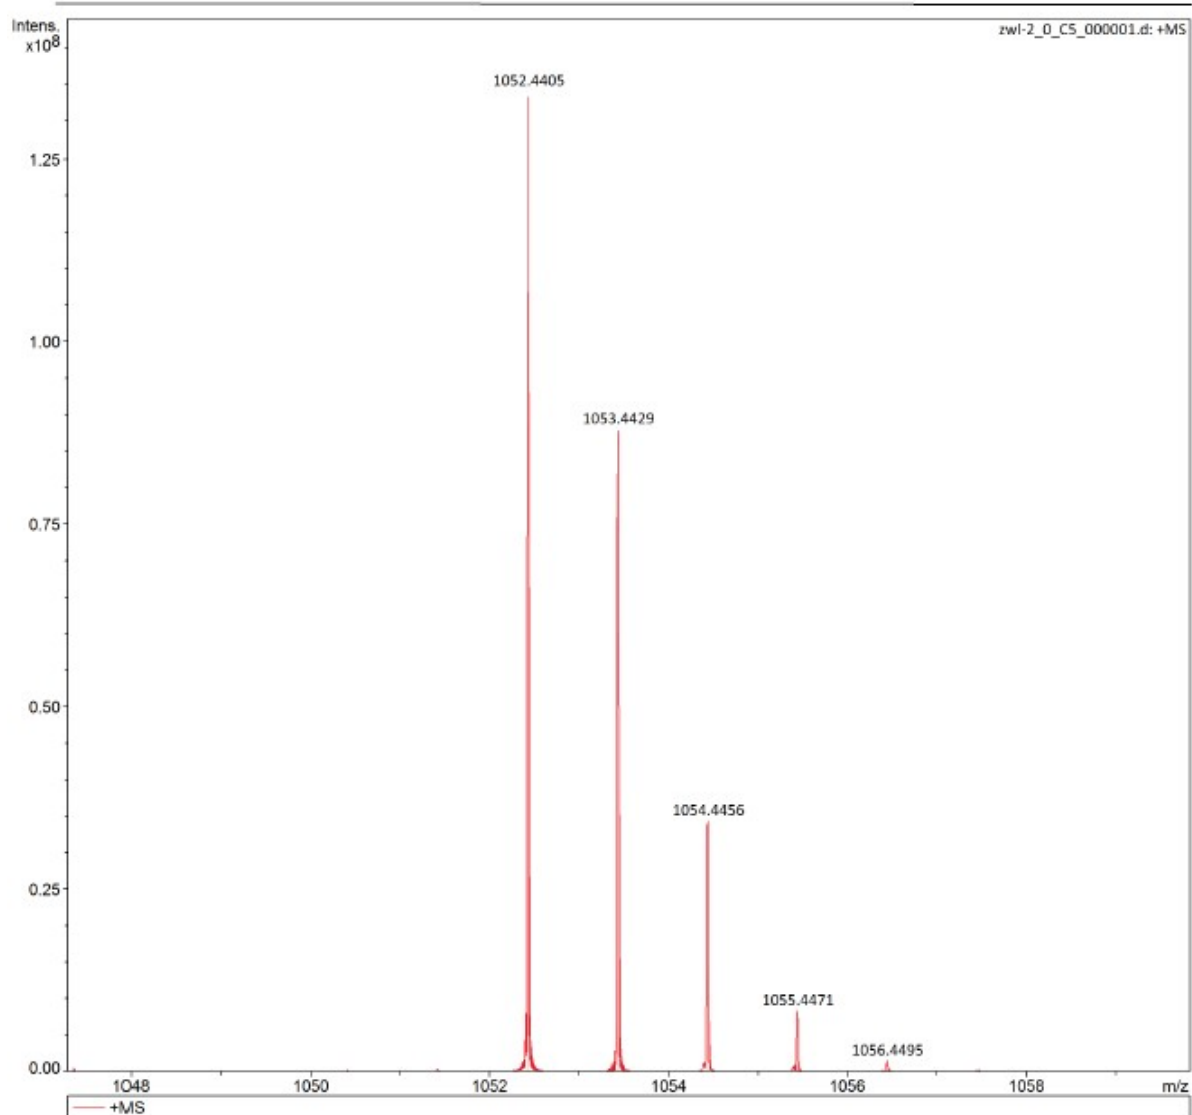

**Fig. S4** HR-MS (ESI) spectrum of **2**.

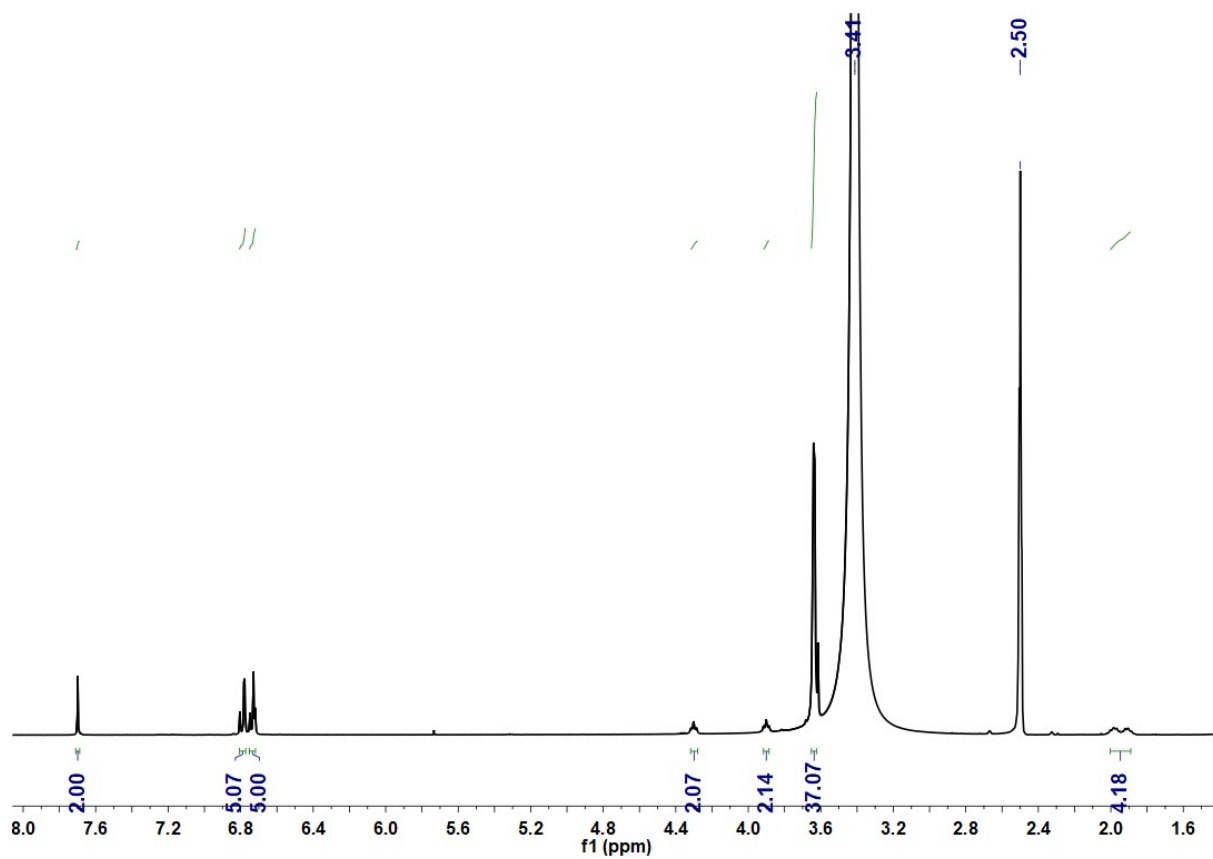

Fig. S5 <sup>1</sup>H NMR (400 MHz) spectrum of H in DMSO-d<sub>6</sub> at 25 °C.

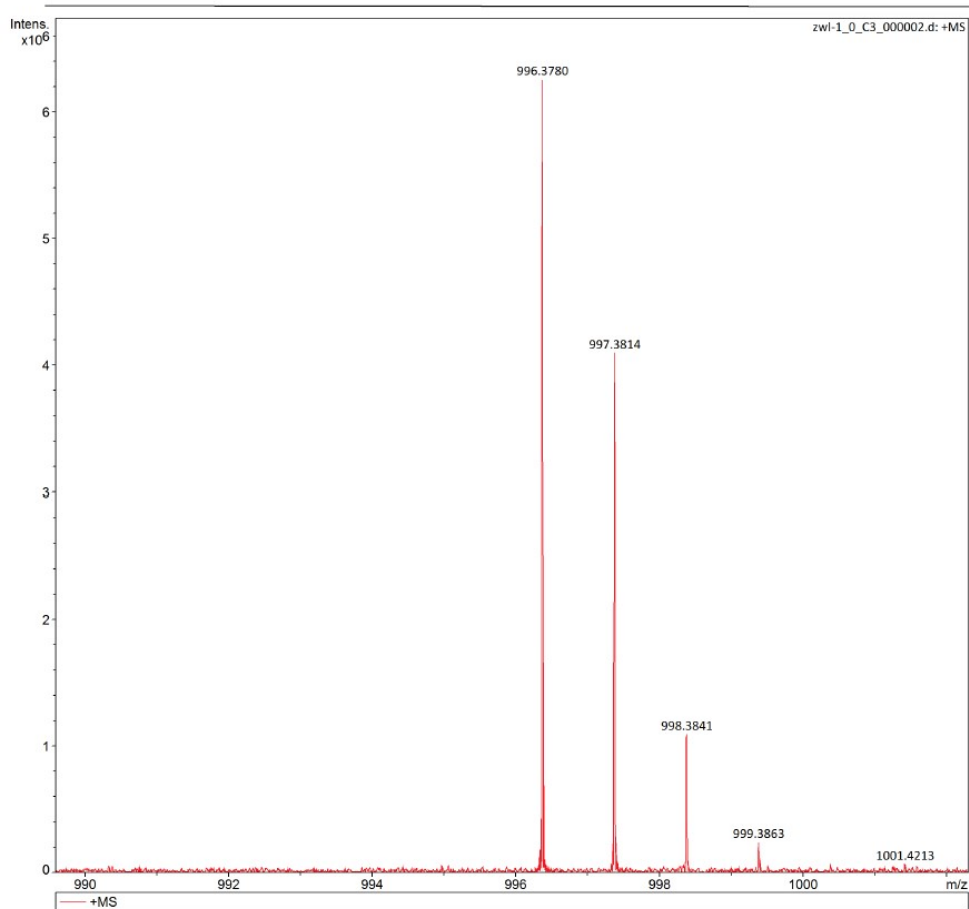

**Fig. S6** HR-MS (ESI) spectrum of H.

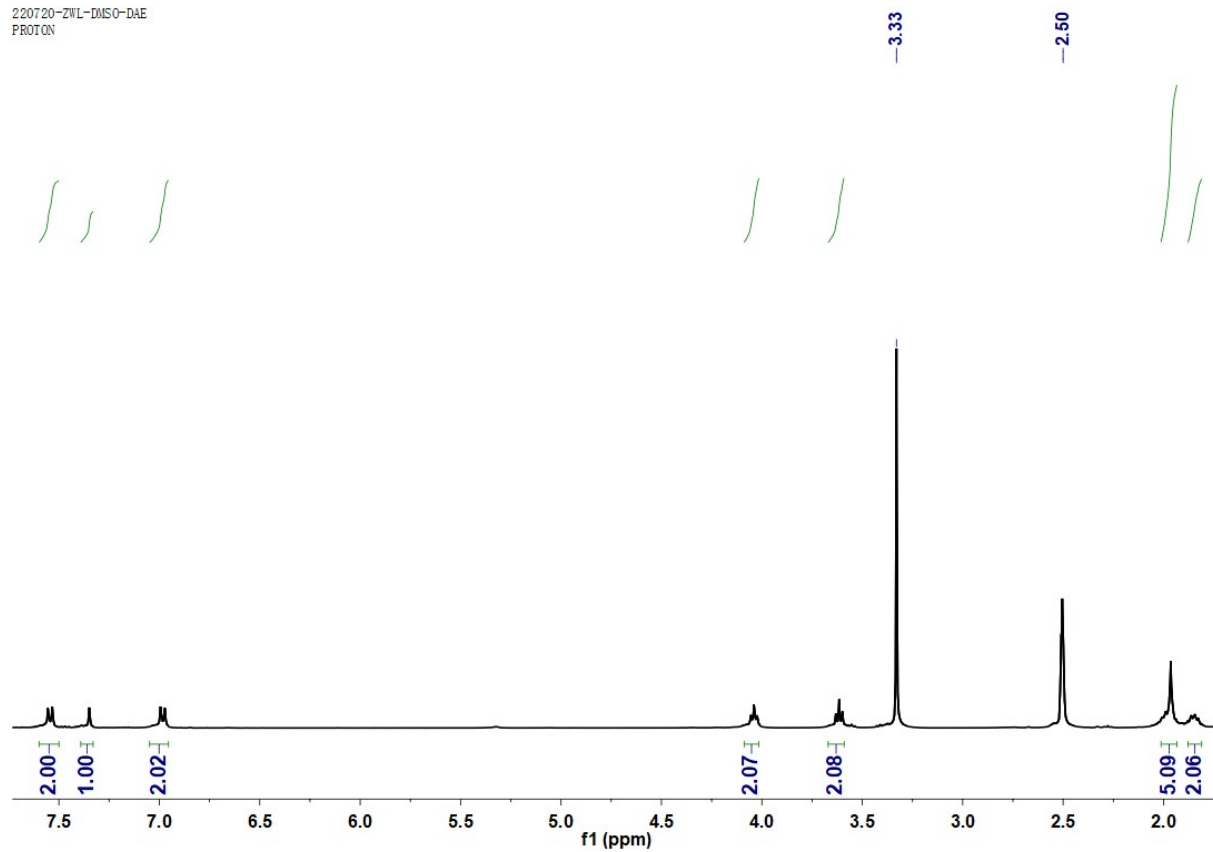

Fig. S7 <sup>1</sup>H NMR (400 MHz) spectrum of 4 in DMSO-d<sub>6</sub> at 25 °C.



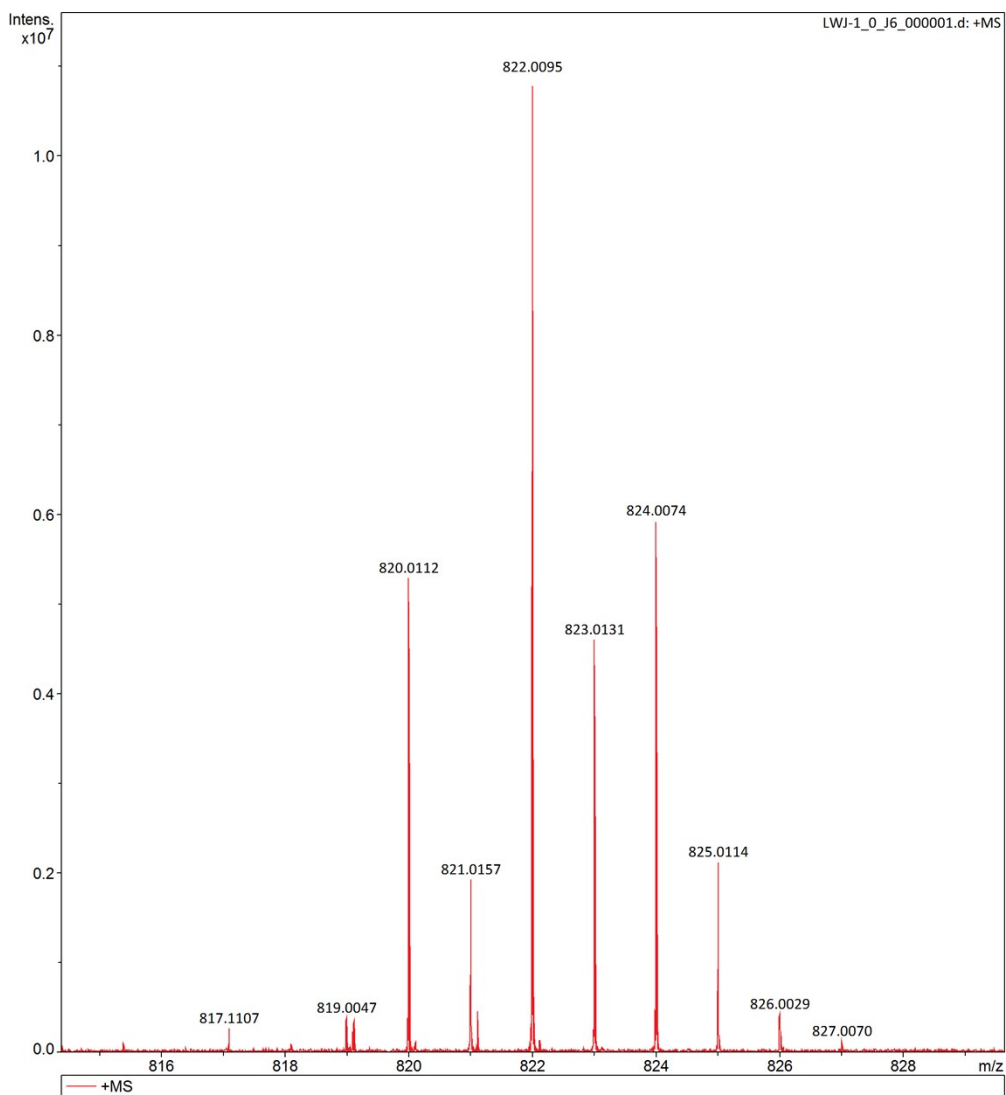

**Fig. S8** HR-MS (ESI) spectrum of 4.

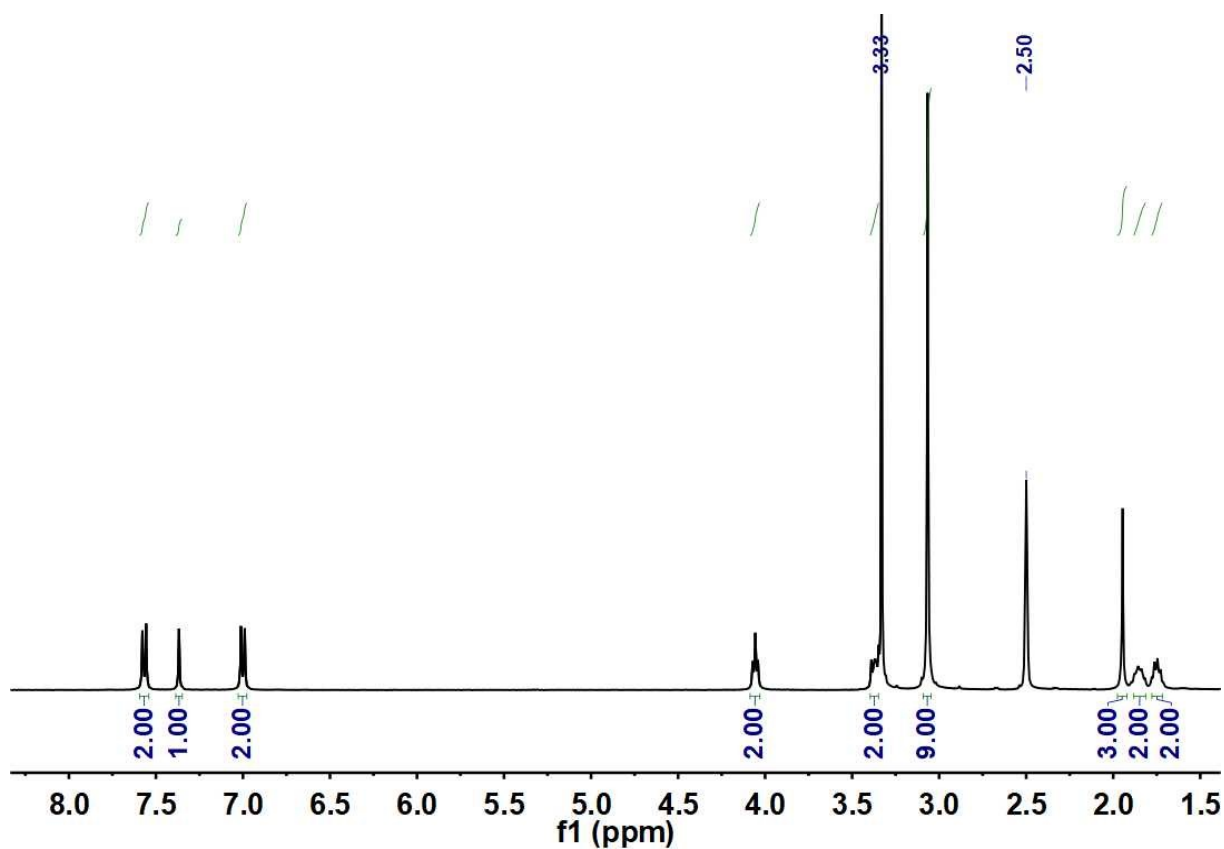

Fig. S9  $^1\text{H}$  NMR (400 MHz) spectrum of  $G_1$  in  $\text{DMSO-d}_6$  at 25  $^\circ\text{C}$ .

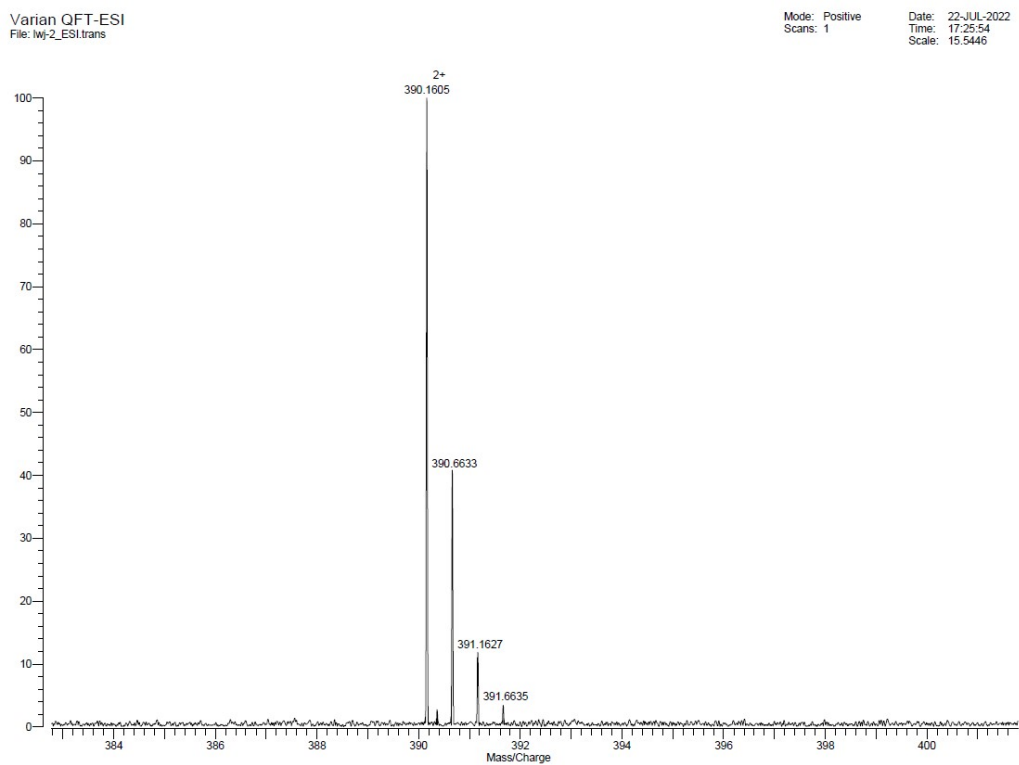

Fig. S10 HR-MS (ESI) spectrum of  $G_1$ .

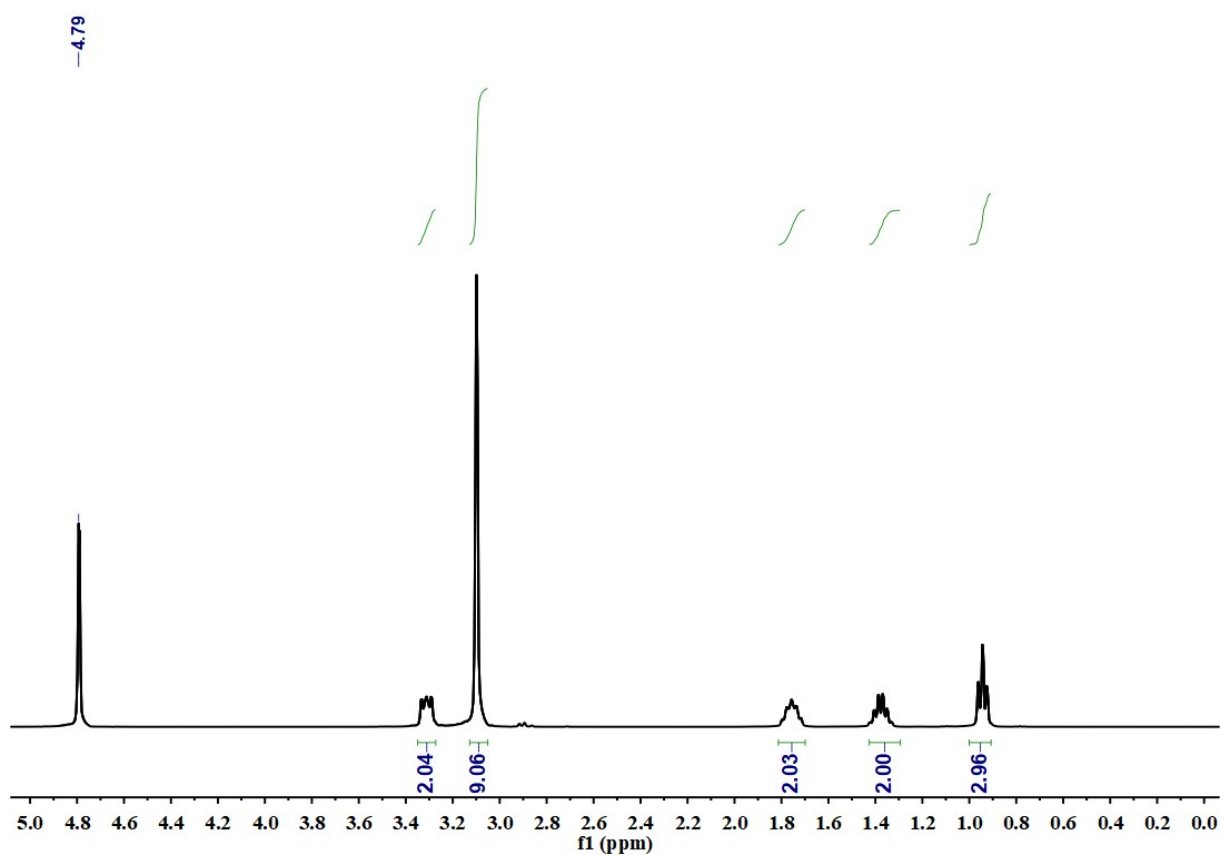

Fig. S11  $^1\text{H}$  NMR (400 MHz) spectrum of  $\text{G}_2$  in  $\text{D}_2\text{O}$  at  $25\text{ }^\circ\text{C}$ .

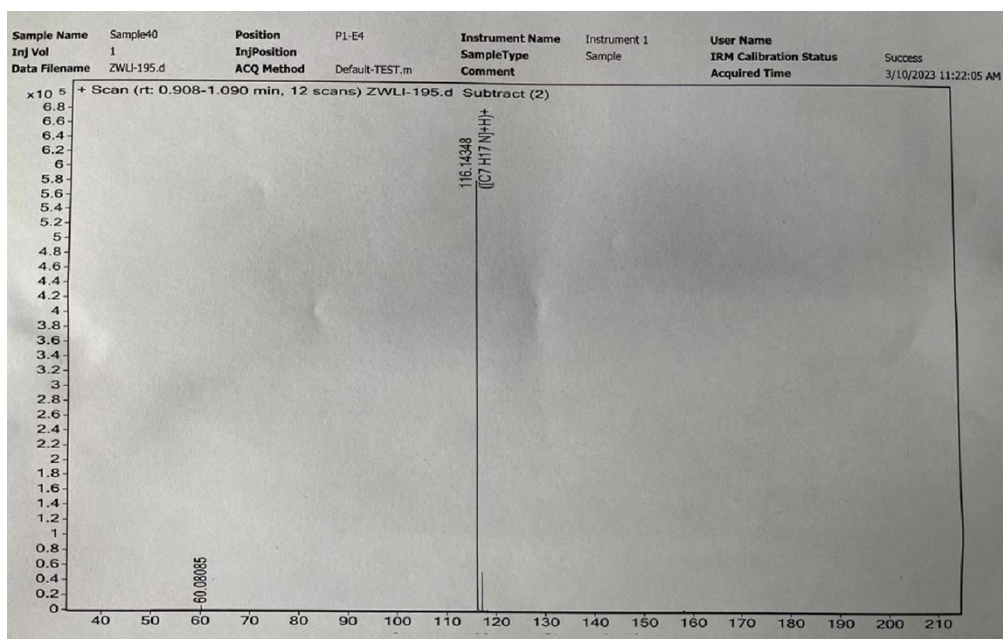

Fig. S12 HR-MS (ESI) spectrum of  $\text{G}_2$ .

## 2. Characterization Data

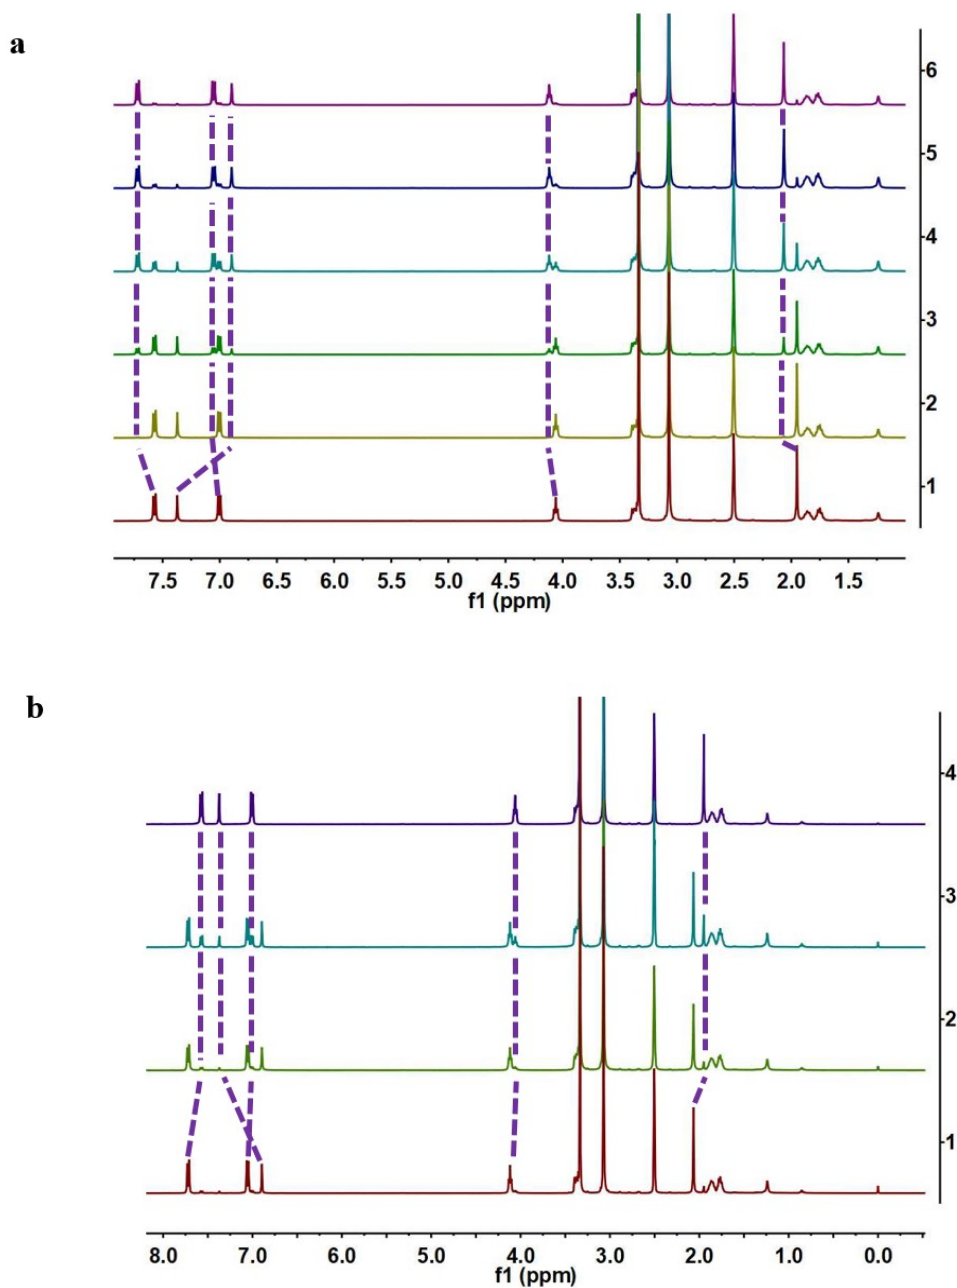

**Fig. S13** (a) <sup>1</sup>H NMR spectral change from G<sub>1</sub> to G<sub>1</sub>' upon irradiation with UV light (254 nm) and (b) a complete recovery from G<sub>1</sub>' to G<sub>1</sub> upon subsequent irradiation with visible light (>450 nm) in DMSO-d<sub>6</sub> at 25 °C.

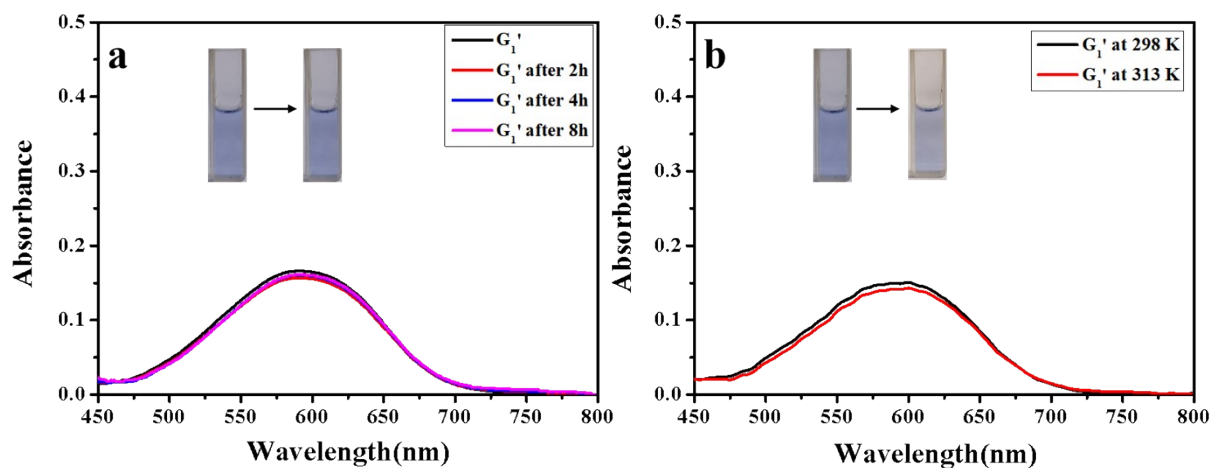

**Fig. S14** Absorption spectra of the closed-ring state  $G_1'$  (a) at different time and (b) at different temperature in water ( $[H] = 0.01 \text{ mM}$ ).

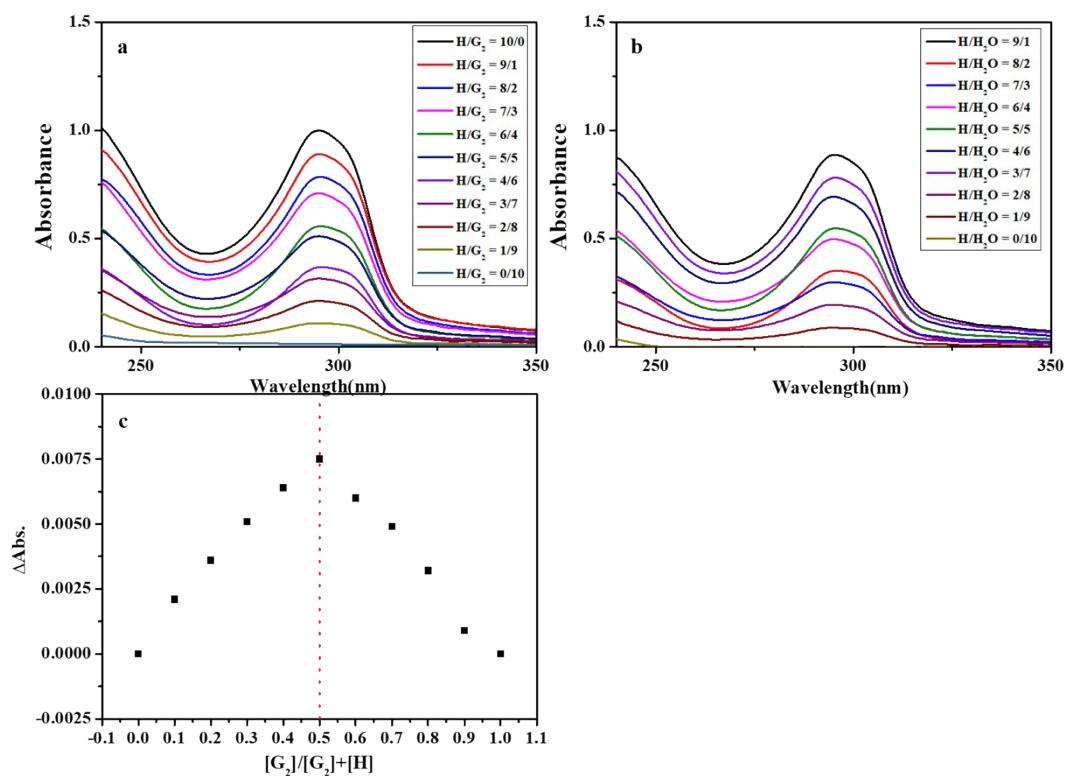

**Fig. S15** Absorption spectra of (a)  $H+G_2$ , (b)  $H+H_2O$  and (c) Job' plots for host molecule  $H$  and guest  $G_2$  in aqueous solution (absorption changes at 295nm,  $[H] + [G_2] = 0.05 \text{ mM}$ ).

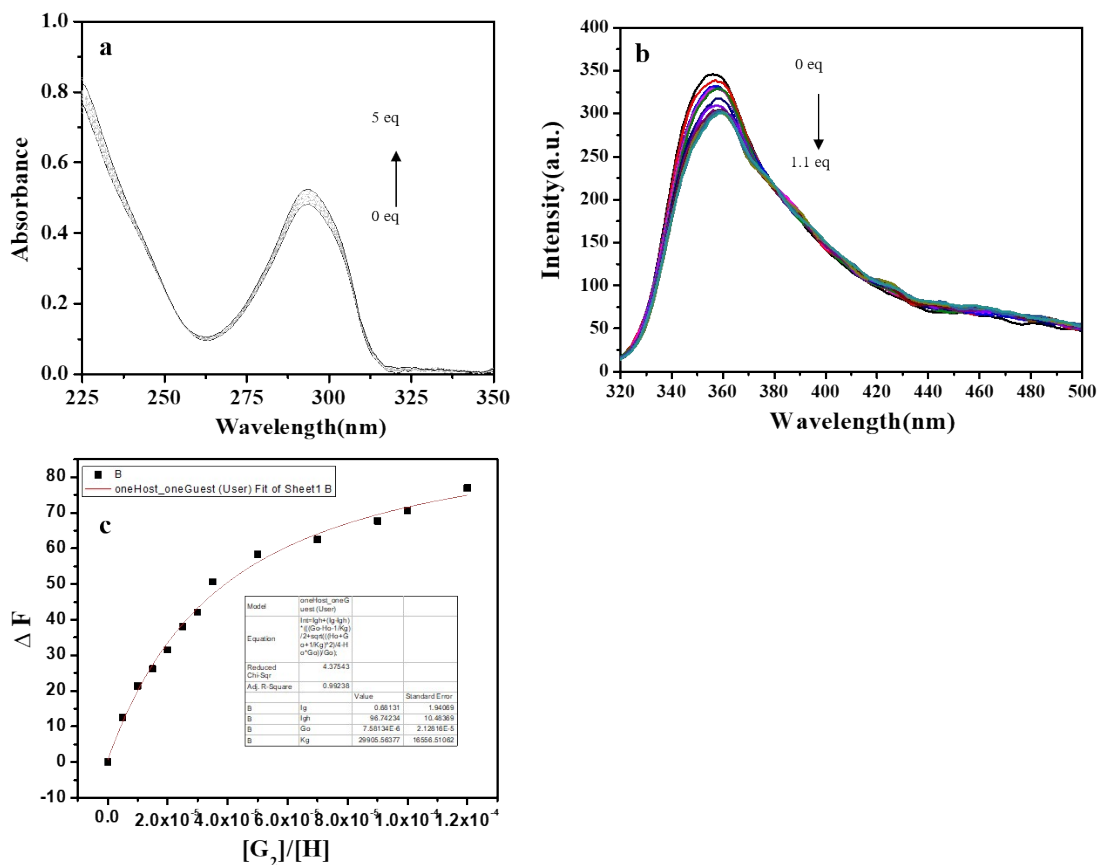

**Fig. S16** (a) Absorption spectra of H (0.03 mM) upon addition of  $G_2$  (from 0 to 5.0 eq) in water. (b) Emission spectra of H (0.05 mM) upon addition of  $G_2$  (from 0 to 1.1 eq). Plots of the emission change at 355 nm versus H concentration in water.

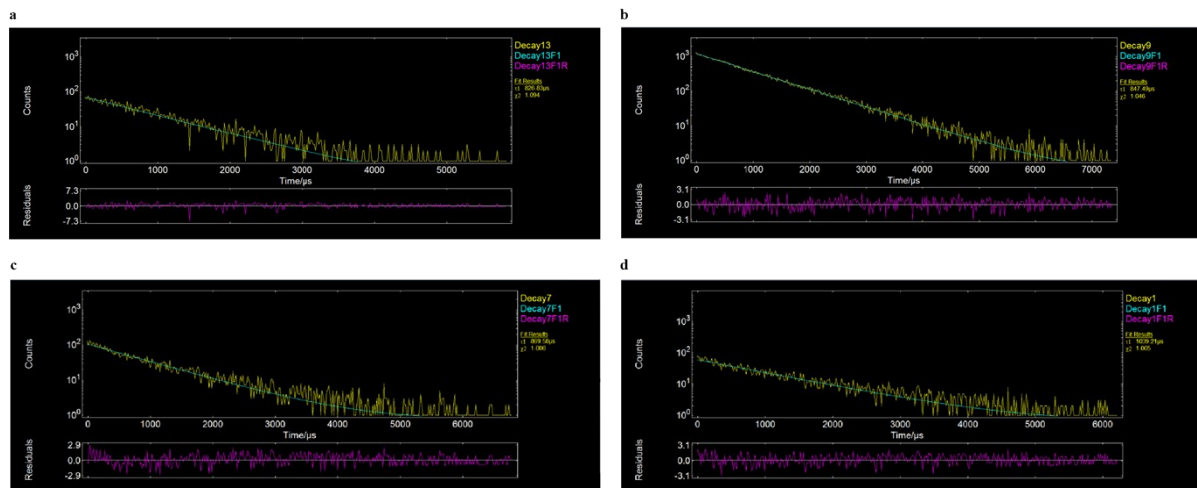

**Fig. S17** Time-resolved photoluminescence decay fitting curves of (a) H/Tb<sup>3+</sup>; (b) H/Tb<sup>3+</sup>/G<sub>1</sub> measured for 545 nm and (c) H/Eu<sup>3+</sup> (d) H/Eu<sup>3+</sup>/G<sub>1</sub> for 615 nm in aqueous solution at 298 K (H = 0.02 mM).

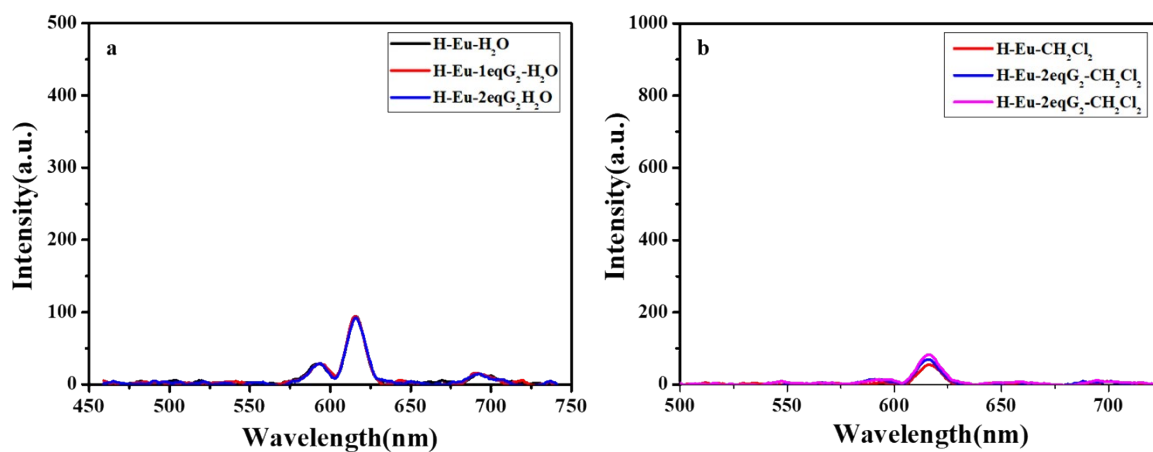

Fig. S18 The emission spectrum changes of reference  $G_2$  in H (a) aqueous solution and (b) organic solution, respectively.

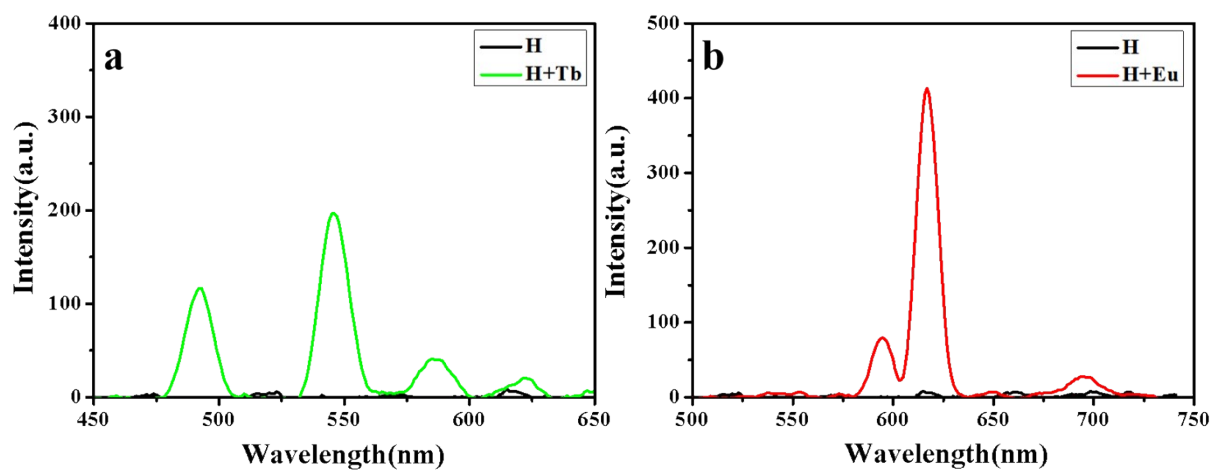

Fig. S19 Emission spectra of H (0.01 mM) upon addition of (a)  $Tb^{3+}$  and (b)  $Eu^{3+}$  in  $CH_2Cl_2$  solution.

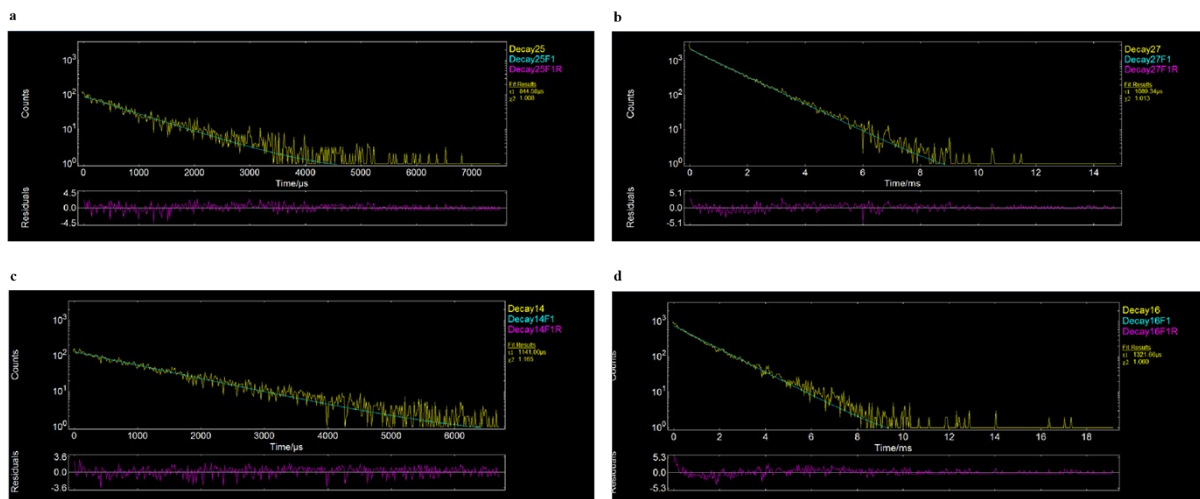

Fig. S20 Time-resolved photoluminescence decay fitting curves of (a)  $H/Tb^{3+}$ ; (b)  $H/Tb^{3+}/G_1$  measured for 545 nm and (c)  $H/Eu^{3+}$ ; (d)  $H/Eu^{3+}/G_1$  measured for 615 nm in  $CH_2Cl_2$  solution ( $H = 0.02$  mM).

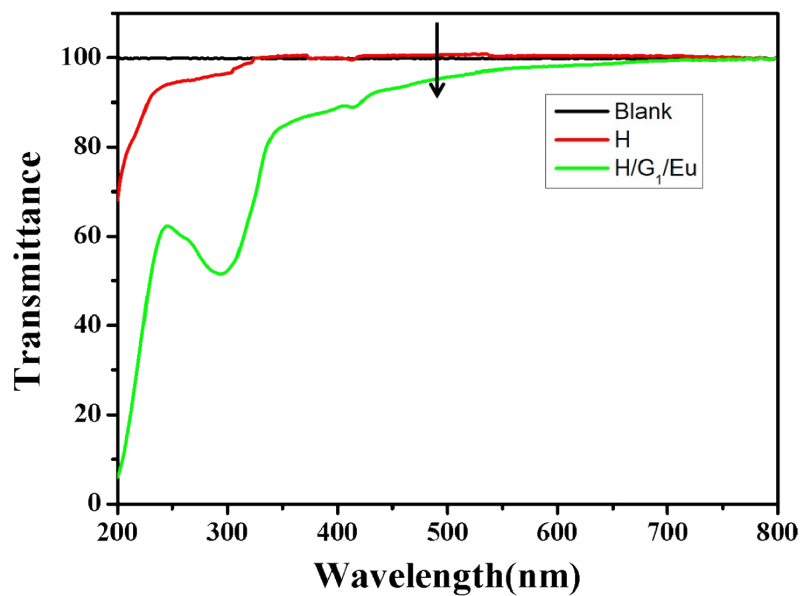

Fig. S21 The optical transmittance of H and H/Eu<sup>3+</sup>/G<sub>1</sub> at 500 nm in water ([H] = 1.0 × 10<sup>-4</sup> M)

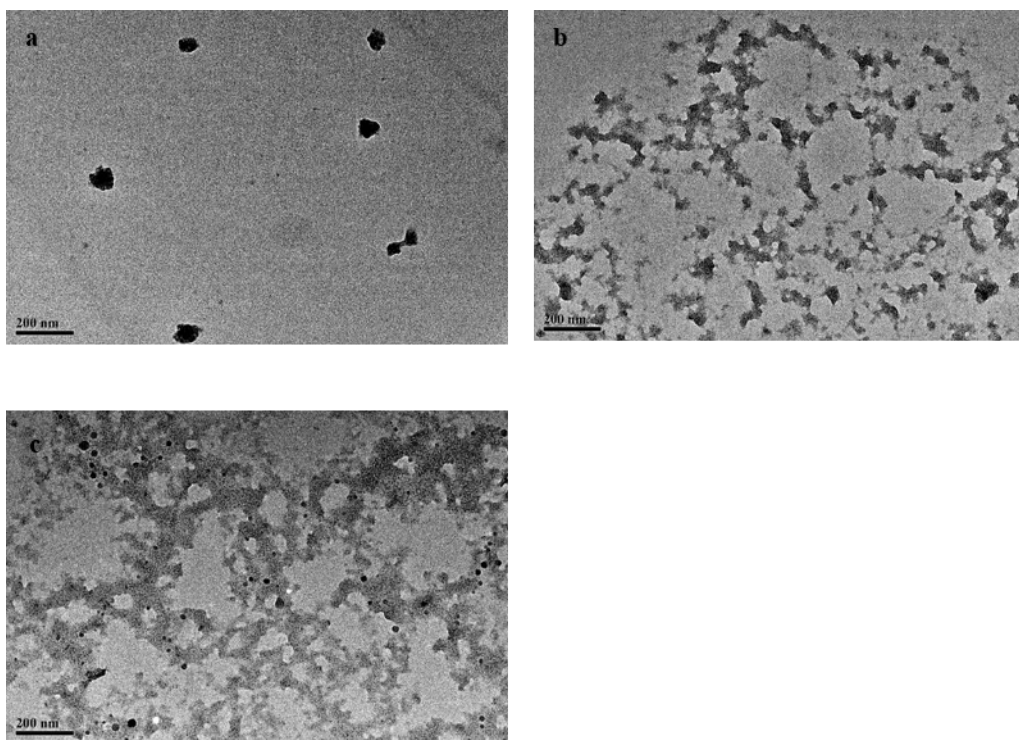

Fig. S22 TEM images of (a) H, (b) H/Eu<sup>3+</sup> and (c) H/Eu<sup>3+</sup>/G<sub>1</sub>.



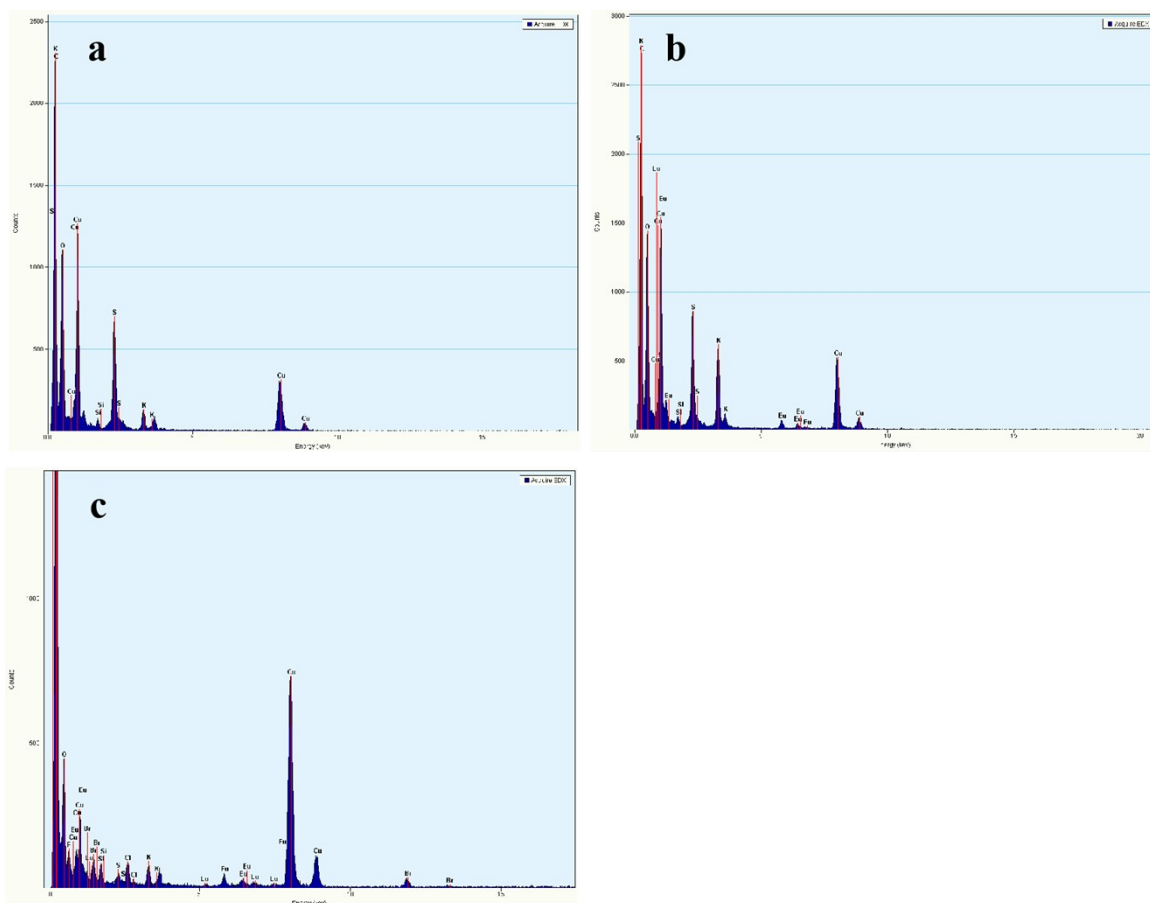

Fig. S23 The TEM-EDS spectrum of (a) H, (b) H/Eu<sup>3+</sup> and (c) H/Eu<sup>3+</sup>/G<sub>1</sub>.

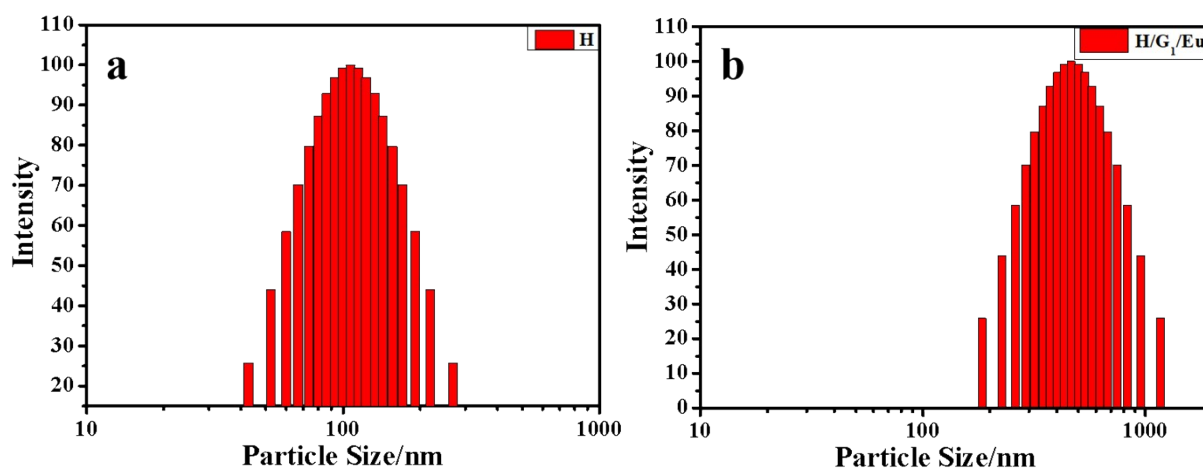

Fig. S24 The DLS data of (a) H and (b) H/Eu<sup>3+</sup>/G<sub>1</sub> assembly (H = 0.02 mM).

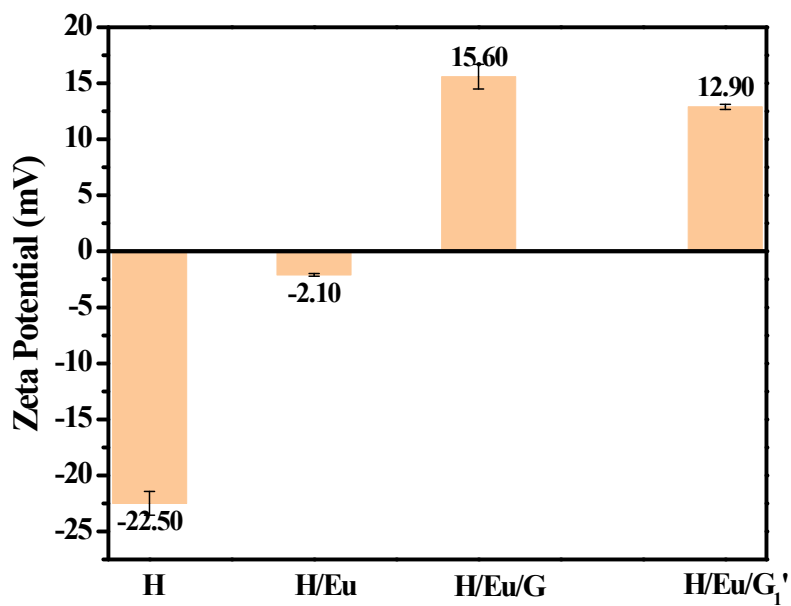

Fig. S25 Zeta potential results of H, H/Eu<sup>3+</sup>, H/Eu<sup>3+</sup>/G<sub>1</sub> and H/Eu<sup>3+</sup>/G<sub>1</sub>' (pH = 6.8).

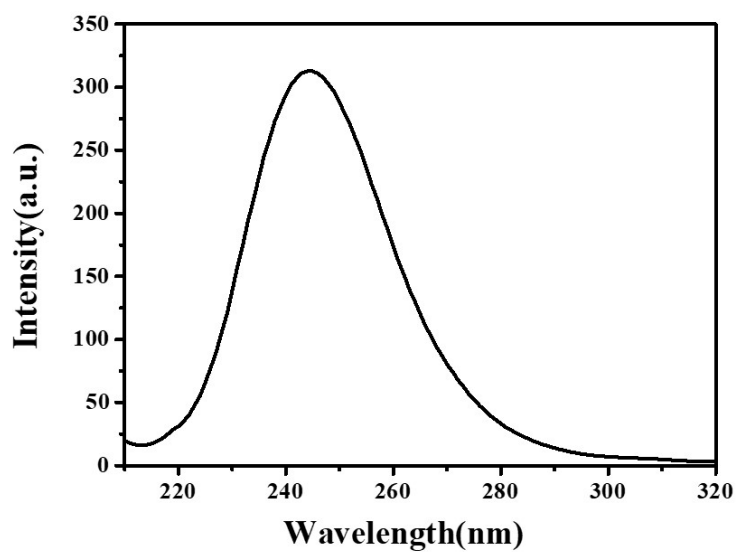

Fig. S26 The excitation spectra of H/Eu<sup>3+</sup>/G<sub>1</sub>.

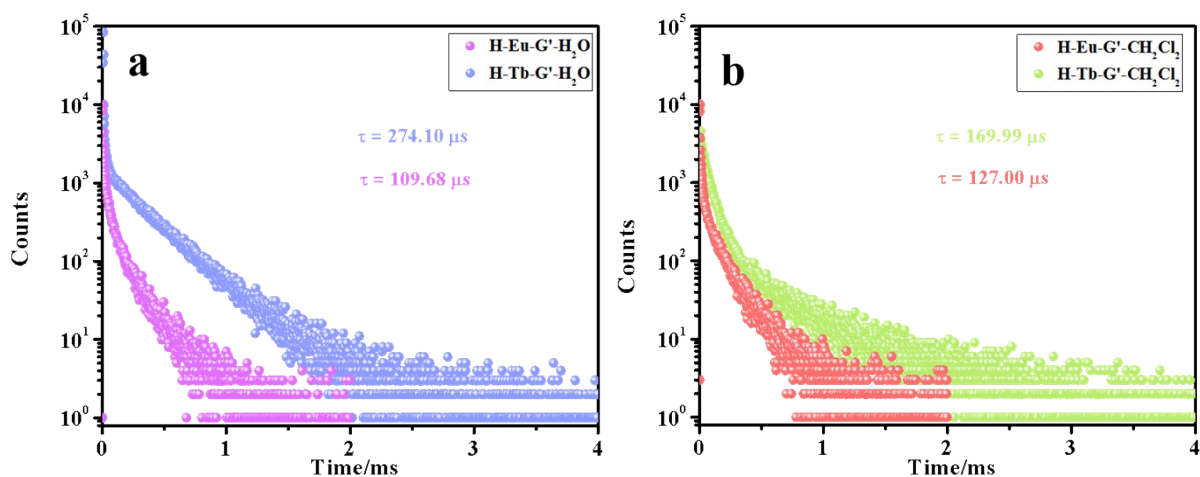

Fig. S27 Time-resolved photoluminescence decay curves of H/Ln<sup>3+</sup>/G<sub>1</sub> (a) in aqueous solution and (b) CH<sub>2</sub>Cl<sub>2</sub> solution.

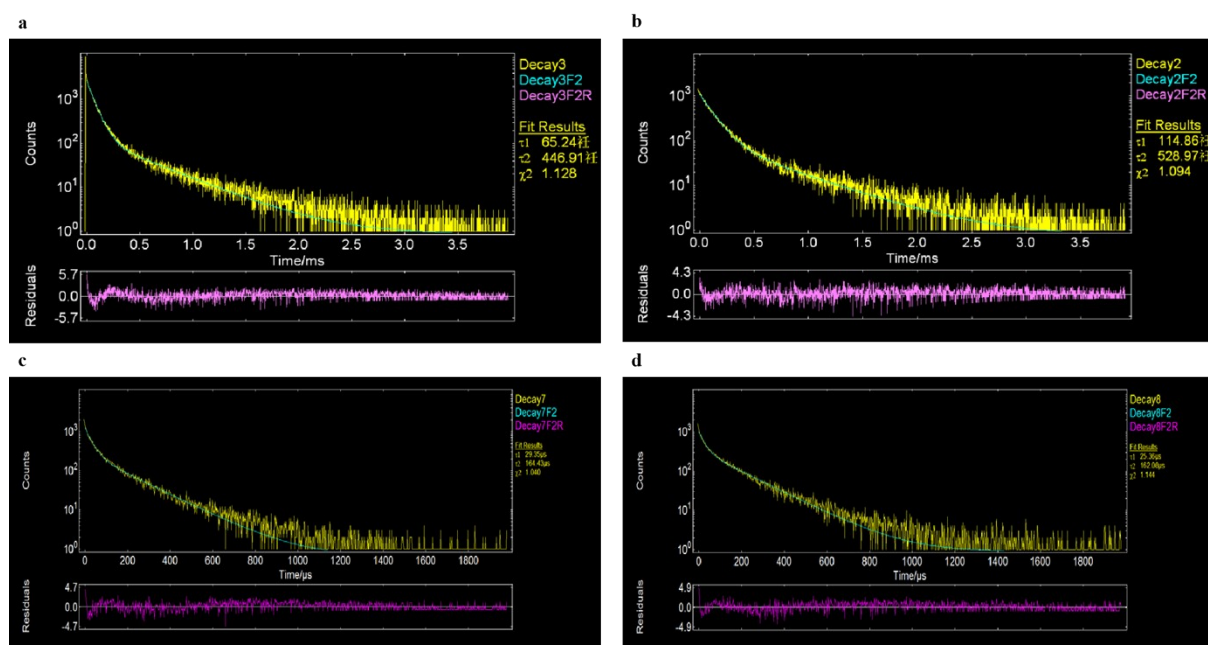

Fig. S28 Time-resolved photoluminescence decay fitting curves of H/Tb<sup>3+</sup>/G<sub>1</sub> (a) in aqueous solution; (b) CH<sub>2</sub>Cl<sub>2</sub> solution, and H/Eu<sup>3+</sup>/G<sub>1</sub> (c) in aqueous solution; (d) CH<sub>2</sub>Cl<sub>2</sub> solution.

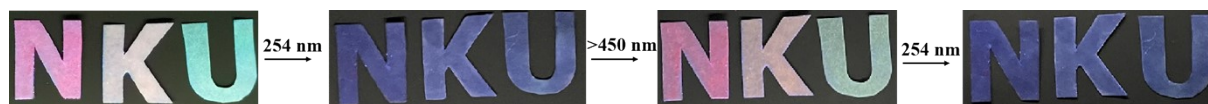

Fig. S29 Luminescent Cyclic images changes under UV light of characters "NKU" written by H/Eu<sup>3+</sup>/G<sub>1</sub> dichloride solution under alternant UV (254 nm) and visible (>450 nm).

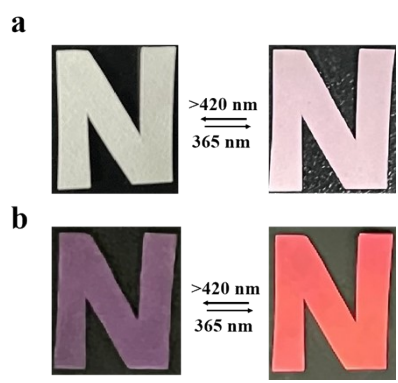

**Fig. S30** (a) Colors change under nature light and (b) Luminescent images changes under UV light of characters “N” written by Commercially available 2-(3', 3'-Dimethyl-6-nitrospiro[chromene]-2,2'-indolin]-1'-yl)ethanol dye methanol solution ( $5.0 \times 10^{-5}$  M).
